# Supplementary material
Source: publisher figshare collection journal article supplement (https://acs.figshare.com/ndownloader/files/24981556)
Supplement: Supplementary file 1 [file 24981556]

## Supporting Information

### Cathodic disintegration as an easily scalable method for the production of Sn and Pb based catalysts for CO<sub>2</sub> reduction

Davide Pavesi<sup>□□\*</sup>; Rim C. J. Van de Pol<sup>||</sup>; Julia L. Krasovic<sup>□</sup>; Marta Figueiredo<sup>||</sup>; Gert-Jan M. Gruter<sup>□□</sup>; Marc T.M. Koper<sup>□</sup>; Klaas Jan P. Schouten<sup>□□\*</sup>

<sup>□</sup>Avantium Chemicals BV, Zekeringstraat 29 1014 BV Amsterdam, The Netherlands

<sup>||</sup>Inorganic Materials and Catalysis, Eindhoven University of Technology, P.O. Box 513, 5600 MB Eindhoven, The Netherlands

<sup>□</sup>Leiden Institute of Chemistry, Leiden University, PO Box 9502, 2300 RA, Leiden, The Netherlands

<sup>□</sup>Van 't Hoff Institute for Molecular Sciences, University of Amsterdam, PO Box 94157, 1090 GD Amsterdam | the Netherlands

[davide.pavesi@avantium.com](mailto:davide.pavesi@avantium.com)

[KlaasJan.Schouten@avantium.com](mailto:KlaasJan.Schouten@avantium.com)

Number of pages of SI: 4

Number of Tables in SI: 2

Number of Figures in SI: 2

## SUPPLEMENTARY FIGURES AND TABLES

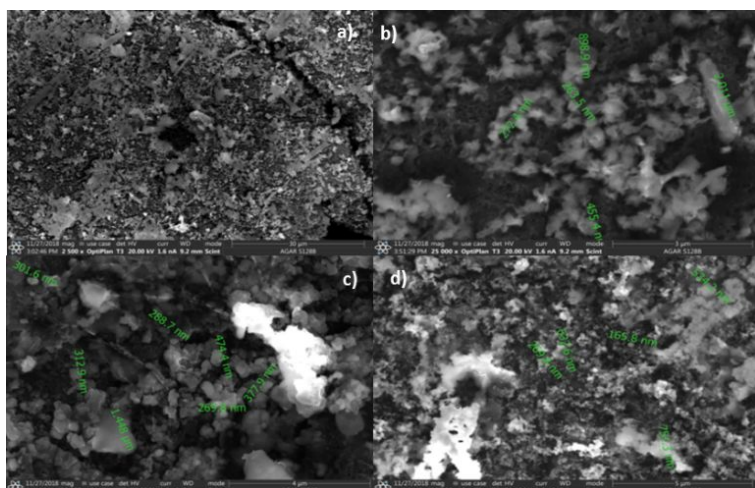

Figure S1. Catalyst morphology and distribution on GDEs a) overview of Pb catalyst: rods and irregular particles are predominant b) zoom-in on Pb catalyst c) Sn catalyst on GDE, consisting mostly of irregularly shaped particles d) Sn50Pb50 catalyst on GDE, similar to Sn only one.

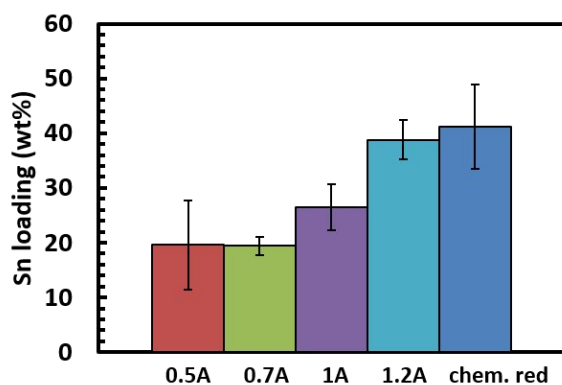

Figure S2. Sn loading on the carbon support estimated from EDX analysis.

| Disintegration current  | Charge passed | Weight loss |
|-------------------------|---------------|-------------|
| 1250 mA/cm <sup>2</sup> | 108C          | 13.7 mg     |
| 1875 mA/cm <sup>2</sup> | 108C          | 20.47mg     |
| 2500 mA/cm <sup>2</sup> | 108C          | 38.81mg     |

Table S1. weight loss of Sn wires in 0.1M NaOH at different currents but same charge passed.

| Catalyst                             | Starting V | Starting power | Reaction time |
|--------------------------------------|------------|----------------|---------------|
| Sn/C 0.5A (1042 mA/cm <sup>2</sup> ) | 15.5 V     | 7.75 W         | 16 min        |
| Sn/C 0.7A (1458 mA/cm <sup>2</sup> ) | 19 V       | 13.3 W         | 10.5 min      |
| Sn/C 1A (2083 mA/cm <sup>2</sup> )   | 20.5 V     | 20.5 W         | 8 min         |
| Sn/C 1.2A (2500 mA/cm <sup>2</sup> ) | 20.5 V     | 24.6 W         | 6.5 min       |

**Table S2. Summary of reaction conditions for the cathodic disintegration synthesis. The current densities are calculated on the basis of the 0.48 cm<sup>2</sup> area of wire exposed to the electrolyte. This current density is only valid with the starting geometry of the wire, which is going to change during corrosion. The starting V of Sn/C 1A and Sn/C 1.2A is the same (maximum V reachable by the power supply). This was achieved by reducing the distance between anode and cathode and therefore the ohmic drop between the two.**

**Calculation of atom efficiency of the synthesis.** The atom efficiency is a useful indicator, commonly used in organic synthesis, which describes how many of the atoms present in the reagents can be found in the product. Any atom or molecule remaining in the reaction mixture which is not a desired product is waste and needs to be disposed of. The atom efficiency can be calculated from the stoichiometrically balanced chemical reaction. To calculate the atom efficiency we utilized the following chemical reactions.

CHEMICAL REDUCTION:

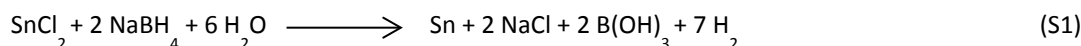

In this case, we assumed that water would take part in the reaction since the ethylene glycol used for the synthesis was not anhydrous and the Sn salt contained water being in dihydrate form.

In the case of the cathodic disintegration we are assuming that the production of metallic particles goes through the formation and immediate oxidation by the aqueous electrolyte (with production of hydrogen) of unstable Zintl phases. We calculated the atom efficiency basing the calculation on two possible cluster anion candidates: the most well documented one (Sn<sub>9</sub><sup>4-</sup>) and the one that was most unfavorable for our calculation (i.e. with the worst negative charge to number of Sn atoms in the cluster ratio, being Sn<sub>4</sub><sup>4-</sup>).

CATHODIC DISINTEGRATION:

Cathode half-reaction

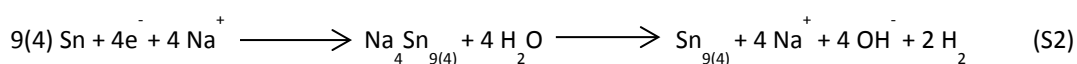

Anode half-reaction

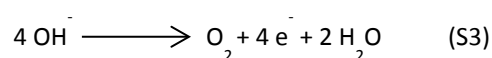

Overall reaction

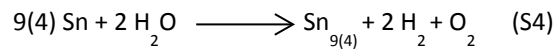

For all the reactions it is left implicit the subsequent agglomeration of the Sn atoms or clusters into larger particles. In the case of the particles produced with disintegration we are also assuming that the clusters are oxidized by the water and coalesce into particles before being captured by the carbon.

$$\text{Using the formula for the atom efficiency} = \frac{\Sigma \text{ MW desired products}}{\Sigma \text{ MW all reagents}} * 100 \quad (\text{S5})$$

we get a value of 31.8% for the chemical reduction route, 96.7% for the cathodic disintegration considering the Zintl phase based on  $\text{Sn}_9^{4-}$  and 92.9% considering the Zintl phase based on  $\text{Sn}_4^{4-}$ .
